# Supplementary material for: Bacteriophages Infecting Propionibacterium acnes
Source: Biomed Res Int. 2013 Apr 11;2013:705741. doi: 10.1155/2013/705741 (PMC3652107; doi:10.1155/2013/705741)
Supplement: Supplementary file 1 — Supplementary Table 1. Identified CRISPR spacers in CRISPR/cas regions of sequenced P. acnes strains. Identified spacers from all currently publicly available P. acnes genomes were extracted (reference 55, 64, 66) and were screened for homology to known nucleotide sequences. Supplementary Table 2. Identified CRISPR spacers originating from P. acnes phages. Based on all the available CRISPR spacers of P. acnes (reference 55, 64, 66, see Supplementary Table 1), spacers with similarities to published P. acnes phage genomes were analyzed based on their length, GC content, orientation and localization. [file 705741.f1.xlsx]

## Sheet: Blad1
Strain	Spacer sequence	Length	Spacer #	BLAST result	Comment
36.1.R1	CGGCCTGCGGCAGATTTTTGTTGCGTTGAATCC	33	1	phage	gp14
	CGGGCAGAGGATGTGTTGCTCGTTCCTGGATGG	33	2	phage	gp32
	GTTACGCTGGAACCCCCAATGAACACGCGAGAA	33	3	phage	gp6
	GAGGGCTACCACGTGGTCGATTTGGACTGTCG	32	4	P. acnes	bacteriocin locus
	CAGGCGCTCCACTCCCTCGCCCTGGCCACCAAC	33	5	phage	gp16
CUG50655	AGGGCTACCACGTGGTCGATTTGGACTGTCG	31	4	P. acnes	bacteriocin locus
	GGCGCTCCACTCCCTCGCCCTGGCCACCAAC	31	5	phage	gp16
18.2.L1	ACCGGGCCCATCCCGGTCGGCCTCCTGAAAGG	32	6	P. acnes	TAD locus
	TGGCTAGTACGGCCACGGATGAGATTGAGGCC	32	7	P. acnes	TAD locus
	GTGAACGGGGCATGGGATTAGCCGAGGCGCTA	32	8	P. acnes	TAD locus
	ACCACTCGGGGTGGGACTGCCCAGTTTTATTG	32	9	No hit	N/A
	GTGAACGGGGCATGGGATTAGCCGAGGCGCTA	32	8	P. acnes	TAD locus
	ACCACTCGGGGTGGGACTGCCCAGTTTTATTG	32	9	No hit	N/A
	GCCTACCGTCAGCTGACTCACGCCTCCGCGTT	32	10	P. acnes	TAD locus
	TCACACCAGTCATCAGCGTCATAGTCCTCTCGG	33	11	No hit	N/A
CCUG33951	CCATGAGCGGCTGCGCTCCCGATCGGCGGCG	31	12	P. acnes	TAD locus
	GGCGCTCCACTCCCTCGCCCTGGCCACCAAC	31	5	phage	gp16
7.1.L1	GAGGGCTACCACGTGGTCGATTTGGACTGTCG	32	4	P. acnes	bacteriocin locus
	AGGCGCTCCACTCCCTCGCCCTGGCCACCAAC	32	5	phage	gp16
CCUG27534	GGCGCTCCACTCCCTCGCCCTGGCCACCAAC	31	5	phage	gp16
5.1.R1	GAGGGCTACCACGTGGTCGATTTGGACTGTCG	32	4	P. acnes	bacteriocin locus
	AGGCGCTCCACTCCCTCGCCCTGGCCACCAAC	32	5	phage	gp16
10.1.R1	TTGGGTGGGTGAGGTCGGGTCGTCAGTCATGAG	33	13	V. maris	cse3
	ACGTCGTGAACGTACCCCTTGACGGAGACGGCA	33	14	No hit	N/A
	CGGTGTTAACGGCTTGCCTGGCTTGGATGGAGC	33	15	No hit	N/A
	CCCATACTGTGCGGGTTGGCGACTATCTGTGGA	33	16	No hit	N/A
1.4.R1	TTGGGTGGGTGAGGTCGGGTCGTCAGTCATGAG	33	13	V. maris	cse3
	GTCGATGTCGAGATTGGCCTGGGGGTCCATGTC	33	17	P. acnes	TAD locus
	ACGTCGTGAACGTACCCCTTGACGGAGACGGCA	33	14	No hit	N/A
CCUG6528	CCAGACAACCTCGACAACCTGTTCAGGGGATG	32	18	phage	gp25
	ATGGCTAGCCCGGATTTTTGGCTGCCTGAGCG	32	19	P. haitanensis	microsatellite sequences
	GGGCAGAGGATGTGTTGCTCGTTCCTGGATGG	32	2	phage	gp32
	TTACGCTGGAACCCCCAATGAACACGCGAGAA	32	3	phage	gp6
	GAGGGCTACCACGTGGTCGATTTGGACTGTCG	32	4	P. acnes	bacteriocin locus
	CAGGCGCTCCACTCCCTCGCCCTGGCCACCAAC	33	5	phage	gp16
CCUG37286	GTCGACCAGACCCGGATCGGGCGTTTAGGTCG	32	20	P. acnes	TAD locus
	CCATACTGTGCGGGTTGGCGACTATCTGTGGA	32	16	No hit	N/A
CCUG38293	AGGGCTACCACGTGGTCGATTTGGACTGTCG	31	4	P. acnes	bacteriocin locus
	GGCGCTCCACTCCCTCGCCCTGGCCACCAAC	31	5	phage	gp16
CCUG6369	ATCTGCCAACGAGCGAGAGTGGCGCGGTGTTC	32	21	A. multivorum	plasmid pACMV1
	GAGGGCTACCACGTGGTCGATTTGGACTGTCG	32	4	P. acnes	bacteriocin locus
	AGGCGCTCCACTCCCTCGCCCTGGCCACCAAC	32	5	phage	gp16
17.1.A1	AGGCGCTCCACTCCCTCGCCCTGGCCACCAAC	32	5	phage	gp16
18.1.A1	ACCGGGCCCATCCCGGTCGGCCTCCTGAAAGG	32	6	P. acnes	TAD locus
	TGGCTAGTACGGCCACGGATGAGATTGAGGCC	32	7	P. acnes	TAD locus
	GTGAACGGGGCATGGGATTAGCCGAGGCGCTA	32	8	P. acnes	TAD locus
	ACCACTCGGGGTGGGACTGCCCAGTTTTATTG	32	9	No hit	N/A
	GTGAACGGGGCATGGGATTAGCCGAGGCGCTA	32	8	P. acnes	TAD locus
	ACCACTCGGGGTGGGACTGCCCAGTTTTATTG	32	9	No hit	N/A
	GCCTACCGTCAGCTGACTCACGCCTCCGCGTT	31	10	P. acnes	TAD locus
	(T)CACACCAGTCATCAGCGTCATAGTCCTCTCGG	32	11	No hit	N/A
CCUG36609	CACCGGGCCCATCCCGGTCGGCCTCCTGAAA	31	6	P. acnes	TAD locus
	TCACACCAGTCATCAGCGTCATAGTCCTCTC	31	11	No hit	N/A
25.1.A1	CGACTACCTACGGTTGGCCACCGAAATCAGTG	32	22	P. acnes	TAD locus
	GCCTCGATCACCGGGCTGGTCGGCGTTCAGGA	32	23	P. acnes	TAD locus
	TGCGCTGTAGACATGATCATTCCCCCGCTCTC	32	24	No hit	N/A
	TGCGCTGTAGACATGATCATTCCCCCGCTCTC	32	24	No hit	N/A
	TGCGCTGTAGACATGATCATTCCCCCGCTCTC	32	24	No hit	N/A
	AGCACCTCATCCTGTCCGCCGGCACGCCACCC	32	25	No hit	N/A
CCUG33950	CACCGGGCCCATCCCGGTCGGCCTCCTGAAA	31	6	P. acnes	TAD locus
	TCACACCAGTCATCAGCGTCATAGTCCTCTC	31	11	No hit	N/A
CCUG45436	CACCGGGCCCATCCCGGTCGGCCTCCTGAAA	31	6	P. acnes	TAD locus
	TCACACCAGTCATCAGCGTCATAGTCCTCTC	31	11	No hit	N/A
HL060PA1	CGCCTACCGTCAGCTGACTCACGCCTCCGCGTT	33	10	P. acnes	TAD locus
	TCACACCAGTCATCAGCGTCATAGTCCTCTCGG	33	11	No hit	N/A
HL082PA2	CCGAGAGGACTATGACGCTGATGACTGGTGTGA	33	26	No hit	N/A
	CCATTTGGCGTAGGCATCGGGCAGGGCTGAGCC	33	27	P. acnes	TAD locus
HL110PA3/HL110PA4	CTATGTGGACAGTGTTGGTTACTGTGGGGGGAA	33	28	phage	non coding
	GCACTGCACCGATATCGTCGTGGCTGTCACTTG	33	29	No hit	N/A
	CCCAGACAACCTCGACAACCTGTTCAGGGGATG	33	18	phage	gp25
	CATGGCTAGCCCGGATTTTTGGCTGCCTGAGCG	33	19	phage	gp34
	CGGCCTGCGGCAGATTTTTGTTGCGTTGAATCC	33	1	phage	gp14
	CGGGCAGAGGATGTGTTGCTCGTTCCTGGATGG	33	2	phage	gp32
	GTTACGCTGGAACCCCCAATGAACACGCGAGAA	33	3	phage	gp6
	CGAGGGCTACCACGTGGTCGATTTGGACTGTCG	33	4	P. acnes	bacteriocin locus
	CAGGCGCTCCACTCCCTCGCCCTGGCCACCAAC	33	5	phage	gp16
HL001PA1	CATGGCCTGCACACCAGGCGCTTTTAGCACCT	32	30	phage	gp9
	CATGGCCTGCACACCAGGCGCTTTTAGCACCT	32	30	phage	gp9
	CATGGCCTGCACACCAGGCGCTTTTAGCACCT	32	30	phage	gp9
	GGCGTATGACGAGTTGTGGTCGGCGTTTCCTC	32	31	phage	gp15
	CGGTGTTAACGGCTTGCCTGGCTTGGATGGAG	32	15	No hit	N/A
SK182B-JCVI	CATCAAGCATCCGATGCCCGCCCGGAAACACAC	33	32	No hit	N/A
	GTGCGTGCGGCATCTACGAGGGTGCTTACGTTG	33	33	No hit	N/A
	CTCGCGTGTGGTGGTGGCGGCTGTGGGGATTGA	33	34	No hit	N/A
	CGAGTACTACCCCTGGGATGTCATCCGGCTCAT	33	35	No hit	N/A
	CTGTCATCTGACAGCCGGGAATCCCTGGCGAAC	33	36	No hit	N/A
	CTACACGAGGGACGCTACTGTGACCAGCCGCTA	33	37	No hit	N/A
B101.9	GTCTTCTGGGGTGCAGTCGATGTTGGCTGAGCG	33	38	phage	gp9
	CCCATACGCAGCCCCCAAAGCACCAGCATCCTT	33	39	phage	gp2
	CTGCGCCAACAGCCGCATCTGATCCGAATACGG	33	40	phage	gp3
	CGCAGCAATCTCAGAAGGCCACAACAAGTTCGT	33	41	phage	gp7
	CAAATCACCCAAGCCCAACACGCCGCCACCACC	33	42	phage	gp30
	TGTCACCGATTCAATGTATCTATGAGTGGTGTA	33	43	No hit	N/A
	TTGGGTGGGTGAGGTCGGGTCGTCAGTCATGAG	33	13	No hit	N/A
	GTCGATGTCGAGATTGGCCTGGGGGTCCATGTC	33	17	P. acnes	TAD locus
	ACGTCGTGAACGTACCCCTTGACGGAGACGGCA	33	14	No hit	N/A
	ACGTCGTGAACGTACCCCTTGACGGAGACGGCA	33	14	No hit	N/A
B66.8/HL106PA1	GATCGAGTTGGCTGAGTCGAAGGTGTTGCGGTT	33	44	phage	gp16
	CTGCTCATCGCTCAGCTCCTGCGCCTCATCACA	33	45	phage	gp2
	CTGCGCCAACAGCCGCATCTGATCCGAATACGG	33	40	phage	gp3
	CGCAGCAATCTCAGAAGGCCACAACAAGTTCGT	33	41	phage	gp7
	CAAATCACCCAAGCCCAACACGCCGCCACCACC	33	42	phage	gp30
	TGTCACCGATTCAATGTATCTATGAGTGGTGTA	33	43	No hit	N/A
	TTGGGTGGGTGAGGTCGGGTCGTCAGTCATGAG	33	13	No hit	N/A
	GTCGATGTCGAGATTGGCCTGGGGGTCCATGTC	33	17	P. acnes	TAD locus
	ACGTCGTGAACGTACCCCTTGACGGAGACGGCA	33	14	No hit	N/A
B102.1	CGAGGGCTACCACGTGGTCGATTTGGACTGTCG	33	4	P. acnes	bacteriocin locus
	CAGGCGCTCCACTCCCTCGCCCTGGCCACCAAC	33	5	phage	gp16
B102.B	CGAGGGCTACCACGTGGTCGATTTGGACTGTCG	33	4	P. acnes	bacteriocin locus
	CAGGCGCTCCACTCCCTCGCCCTGGCCACCAAC	33	5	phage	gp16
B69.7	CACCGGGCCCATCCCGGTCGGCCTCCTGAAAGG	33	6	P. acnes	TAD locus
B102.10	CACCGGGCCCATCCCGGTCGGCCTCCTGAAAGG	33	6	P. acnes	TAD locus
HL103PA1	CACCGGGCCCATCCCGGTCGGCCTCCTGAAAGG	33	6	P. acnes	TAD locus
J139	CGAGGGCTACCACGTGGTCGATTTGGACTGTCG	33	4	P. acnes	bacteriocin locus
	CAGGCGCTCCACTCCCTCGCCCTGGCCACCAAC	33	5	phage	gp16
