# Supplementary material for: Bacteriophages Infecting Propionibacterium acnes
Source: Biomed Res Int. 2013 Apr 11;2013:705741. doi: 10.1155/2013/705741 (PMC3652107; doi:10.1155/2013/705741)
Supplement: Supplementary file 2 [file 705741.f2.xlsx]

## Sheet: Blad1
Strain	Spacer sequence	Length	GC	Orientation	PA6 (bp)	ORF	Function	Spacer #
36.1.R1	CGGCCTGCGGCAGATTTTTGTTGCGTTGAATCC	33	0.545	fwd	9314-9346	gp14	tape measure	1
	CGGGCAGAGGATGTGTTGCTCGTTCCTGGATGG	33	0.606	fwd	21457-21489	gp32	DNA primase	2
	GTTACGCTGGAACCCCCAATGAACACGCGAGAA	33	0.545	rev	5412-5380	gp6	M head	3
	CAGGCGCTCCACTCCCTCGCCCTGGCCACCAAC	33	0.727	rev	13019-12987	gp16	protease	4
CUG50655	GGCGCTCCACTCCCTCGCCCTGGCCACCAAC	31	0.742	rev	13017-12987	gp16	protease	4
CCUG33951	GGCGCTCCACTCCCTCGCCCTGGCCACCAAC	31	0.742	rev	13017-12987	gp16	protease	4
7.1.L1	AGGCGCTCCACTCCCTCGCCCTGGCCACCAAC	32	0.719	rev	13018-12987	gp16	protease	4
CCUG27534	GGCGCTCCACTCCCTCGCCCTGGCCACCAAC	31	0.742	rev	13017-12987	gp16	protease	4
5.1.R1	AGGCGCTCCACTCCCTCGCCCTGGCCACCAAC	32	0.719	rev	13018-12987	gp16	protease	4
CCUG6528	CCAGACAACCTCGACAACCTGTTCAGGGGATG	32	0.562	rev	17673-17642	gp25	hypothetical	5
	GGGCAGAGGATGTGTTGCTCGTTCCTGGATGG	32	0.594	fwd	21458-21489	gp32	DNA primase	2
	TTACGCTGGAACCCCCAATGAACACGCGAGAA	32	0.531	rev	5411-5380	gp6	M head	3
	CAGGCGCTCCACTCCCTCGCCCTGGCCACCAAC	33	0.727	rev	13019-12987	gp16	protease	4
CCUG38293	GGCGCTCCACTCCCTCGCCCTGGCCACCAAC	31	0.742	rev	13017-12987	gp16	protease	4
CCUG6369	AGGCGCTCCACTCCCTCGCCCTGGCCACCAAC	32	0.719	rev	13018-12987	gp16	protease	4
17.1.A1	AGGCGCTCCACTCCCTCGCCCTGGCCACCAAC	32	0.719	rev	13018-12987	gp16	protease	4
HL110PA3/HL110PA4	CTATGTGGACAGTGTTGGTTACTGTGGGGGGAA	33	0.515	fwd	27851-27883	non coding	N/A	6
	CCCAGACAACCTCGACAACCTGTTCAGGGGATG	33	0.575	rev	17673-17642	gp25	hypothetical	5
	CATGGCTAGCCCGGATTTTTGGCTGCCTGAGCG	33	0.606	fwd	22582-22614	gp34	DNA helicase	7
	CGGCCTGCGGCAGATTTTTGTTGCGTTGAATCC	33	0.545	fwd	9314-9346	gp14	tape measure	1
	CGGGCAGAGGATGTGTTGCTCGTTCCTGGATGG	33	0.606	fwd	21457-21489	gp32	DNA primase	2
	GTTACGCTGGAACCCCCAATGAACACGCGAGAA	33	0.545	rev	5412-5380	gp6	M head	3
	CAGGCGCTCCACTCCCTCGCCCTGGCCACCAAC	33	0.727	rev	13019-12987	gp16	protease	4
HL001PA1	CATGGCCTGCACACCAGGCGCTTTTAGCACCT	32	0.594	rev	6532-6501	gp9	hypothetical	8
	CATGGCCTGCACACCAGGCGCTTTTAGCACCT	32	0.594	rev	6532-6501	gp9	hypothetical	8
	CATGGCCTGCACACCAGGCGCTTTTAGCACCT	32	0.594	rev	6532-6501	gp9	hypothetical	8
	GGCGTATGACGAGTTGTGGTCGGCGTTTCCTC	32	0.594	fwd	11626-11657	gp15	m tail	9
B101.9	GTCTTCTGGGGTGCAGTCGATGTTGGCTGAGCG	33	0.606	fwd	6511-6543	gp9	hypothetical	10
	CCCATACGCAGCCCCCAAAGCACCAGCATCCTT	33	0.606	rev	479-447	gp2	terminase (large)	11
	CTGCGCCAACAGCCGCATCTGATCCGAATACGG	33	0.606	rev	2770-2738	gp3	portal	12
	CGCAGCAATCTCAGAAGGCCACAACAAGTTCGT	33	0.515	rev	5931-5899	gp7	hypothetical	13
	CAAATCACCCAAGCCCAACACGCCGCCACCACC	33	0.636	rev	20127-20095	gp30	hypothetical	14
B66.8/HL106PA1	GATCGAGTTGGCTGAGTCGAAGGTGTTGCGGTT	33	0.545	fwd	13172-13204	gp16	protease	15
	CTGCTCATCGCTCAGCTCCTGCGCCTCATCACA	33	0.607	rev	944-912	gp2	terminase (large)	16
	CTGCGCCAACAGCCGCATCTGATCCGAATACGG	33	0.606	rev	2770-2738	gp3	portal	12
	CGCAGCAATCTCAGAAGGCCACAACAAGTTCGT	33	0.515	rev	5931-5899	gp7	hypothetical	13
	CAAATCACCCAAGCCCAACACGCCGCCACCACC	33	0.636	rev	20127-20095	gp30	hypothetical	14
B102.1	CAGGCGCTCCACTCCCTCGCCCTGGCCACCAAC	33	0.727	rev	13019-12987	gp16	protease	4
B102.8	CAGGCGCTCCACTCCCTCGCCCTGGCCACCAAC	33	0.727	rev	13019-12987	gp16	protease	4
J139	CAGGCGCTCCACTCCCTCGCCCTGGCCACCAAC	33	0.727	rev	13019-12987	gp16	protease	4
